# Supplementary material for: Efficacy of pectins with different degrees of methyl-esterification and of blockiness in preventing gut epithelial cell barrier disruption and the impact on sodium–glucose co-transporter expression under low and high glucose conditions
Source: Royal Society of Chemistry journal article supplement (doi:10.1039/d3fo01436c), 2023-01-01

**Supplementary figure 1.** Confocal laser scanning microscopy of the apical or basolateral expression of sodium-glucose co-transporter1 (SGLT1) in T84 cells with two-dimensional fluorescence detection.

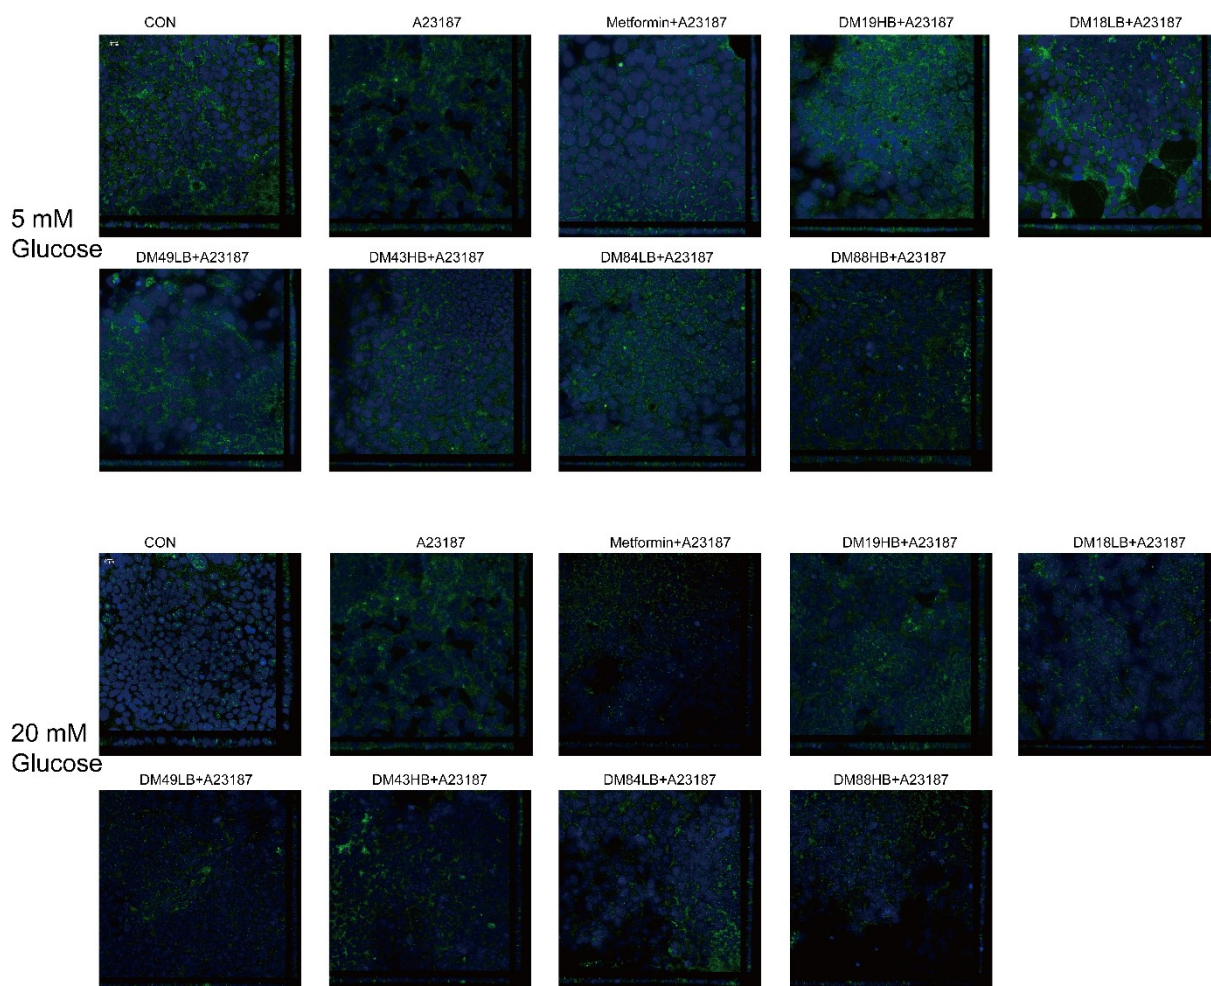

**Supplementary figure 2.** NMR analysis.  $^1\text{H}$ -NMR spectrum of DM19HB was used to assign the peaks of  $\alpha$ -GalA: H-1 at 5.07, H-2 at 3.73, H-3 at 3.97, H-4 at 4.41 and H-5 at 4.71 ppm.  $^{13}\text{C}$ -NMR values are deduced from the HSQC measurement: C-1 at 99.8, C-2 at 69.1, C-3 at 69.5, C-4 at 78.9 and C-5 at 71.9 ppm. The GalA methyl ester ( $\text{OCH}_3$ ) signals are observed at 3.79 ppm ( $^1\text{H}$ ) and 53.4 ppm ( $^{13}\text{C}$ ).

# <sup>1</sup>H and HSQC spectra of DM19HB

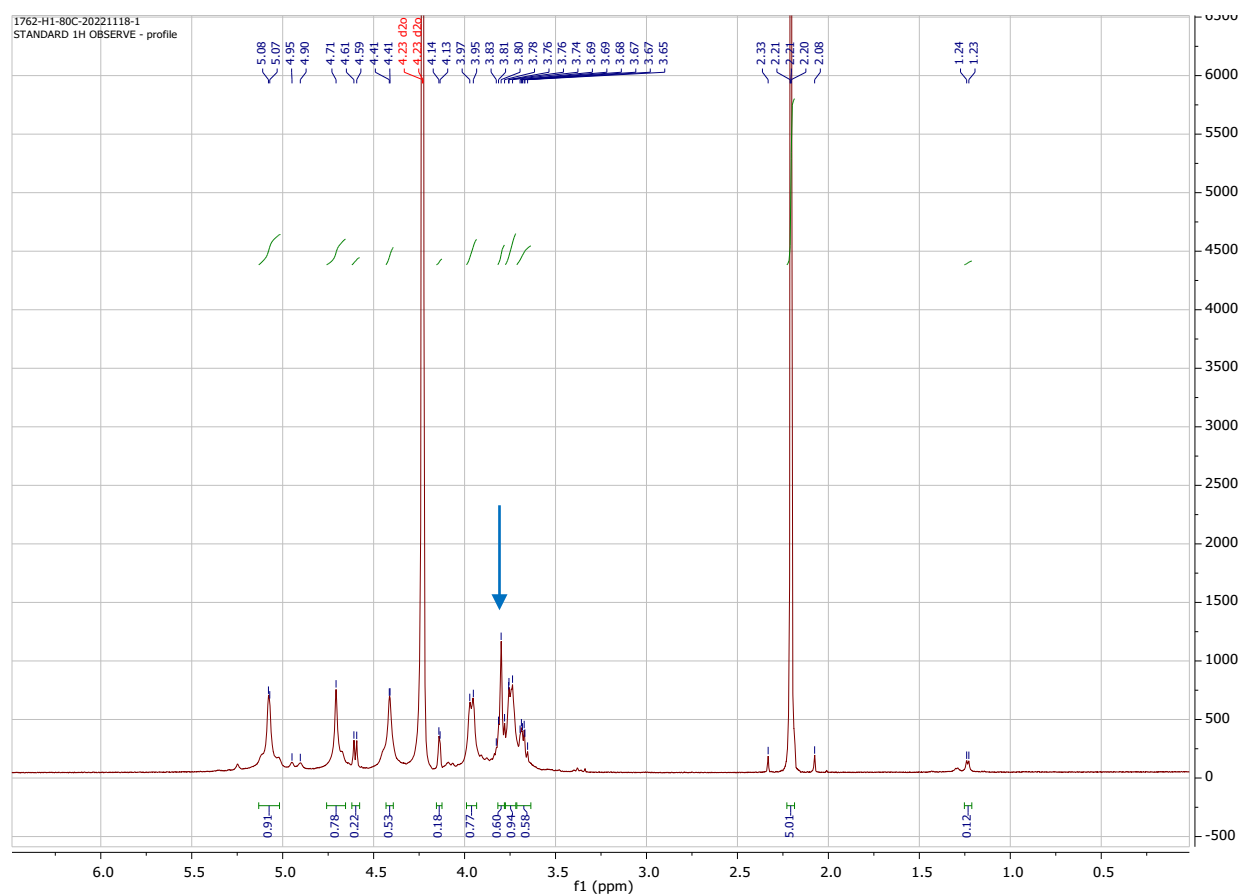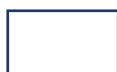

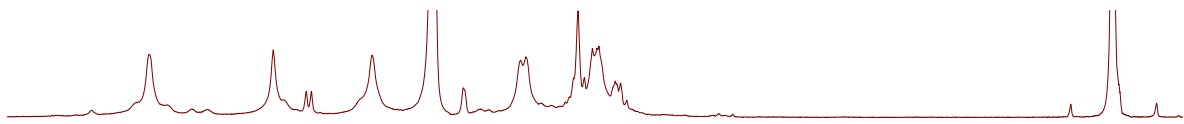

1762-HSQCC13-80C-20221118  
STANDARD 1H OBSERVE - profile

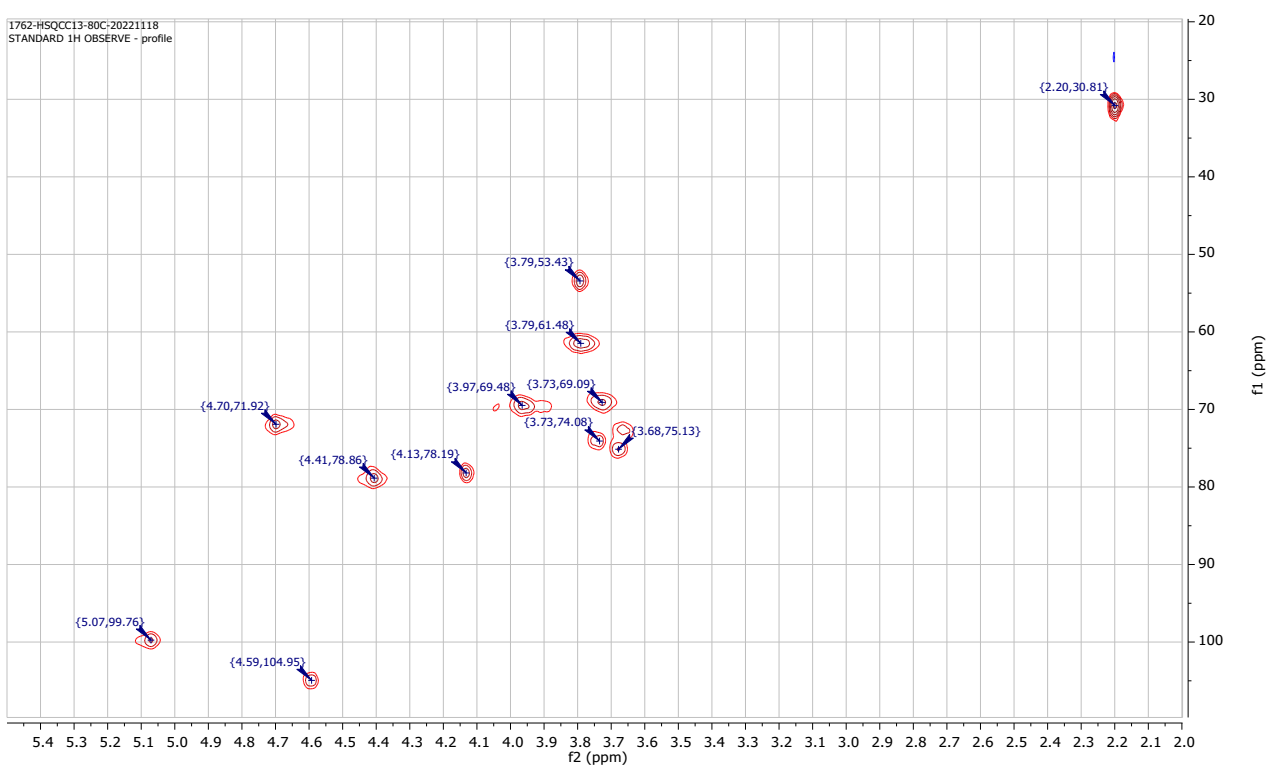

# <sup>1</sup>H and HSQC spectra of DM18LB

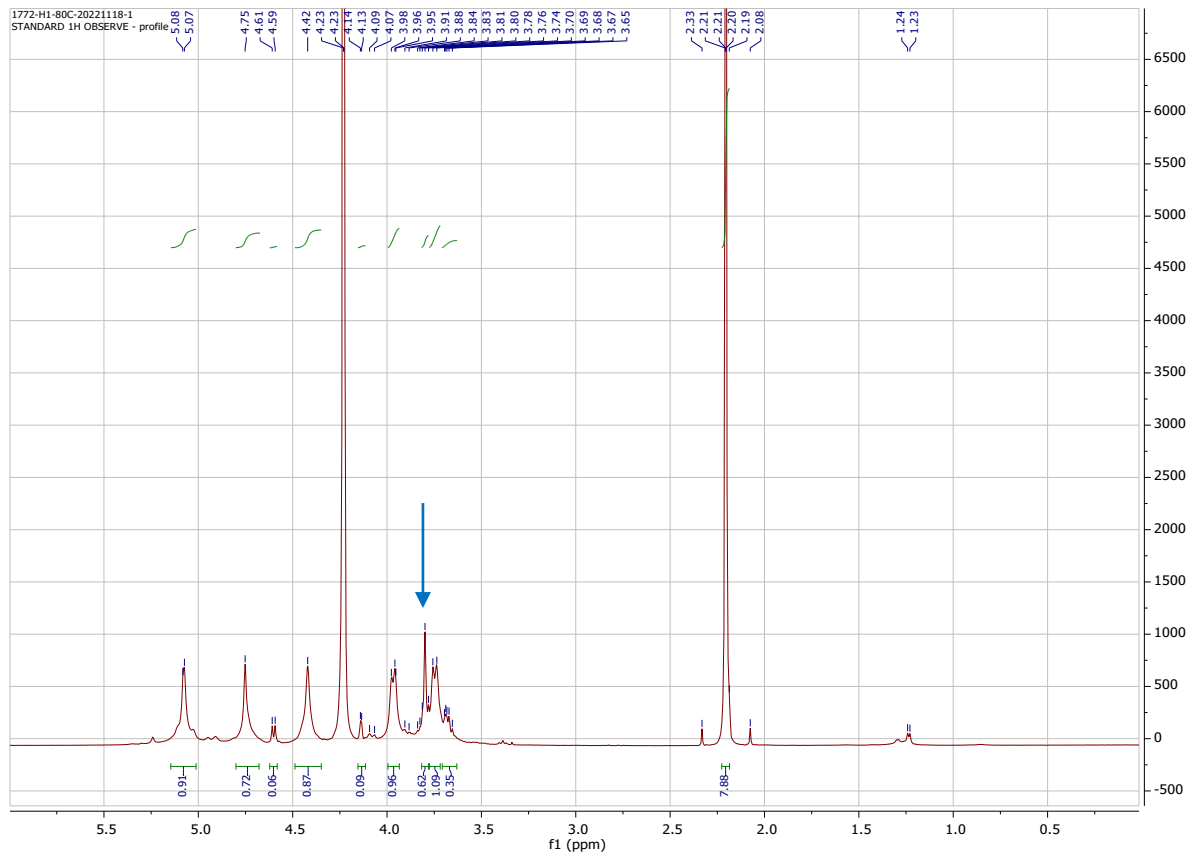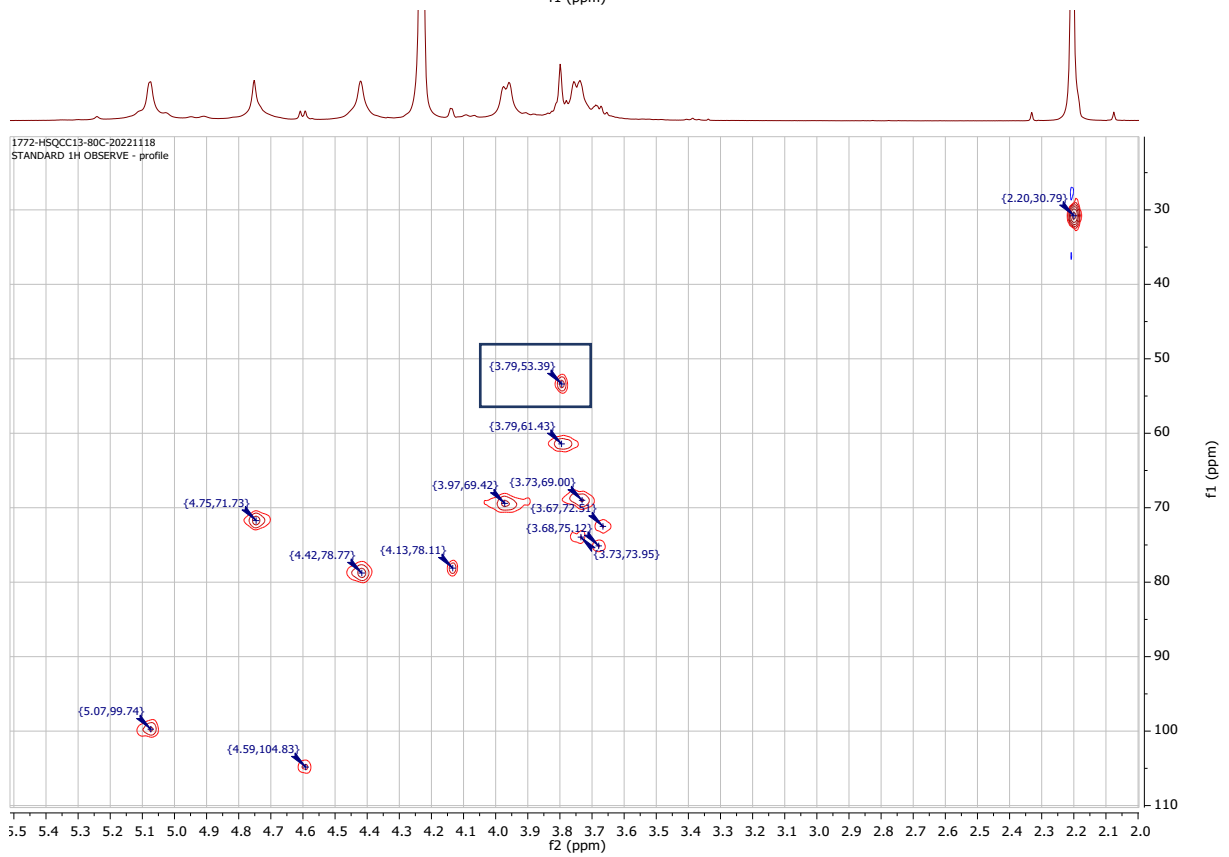

# <sup>1</sup>H and HSQC spectra of DM49LB

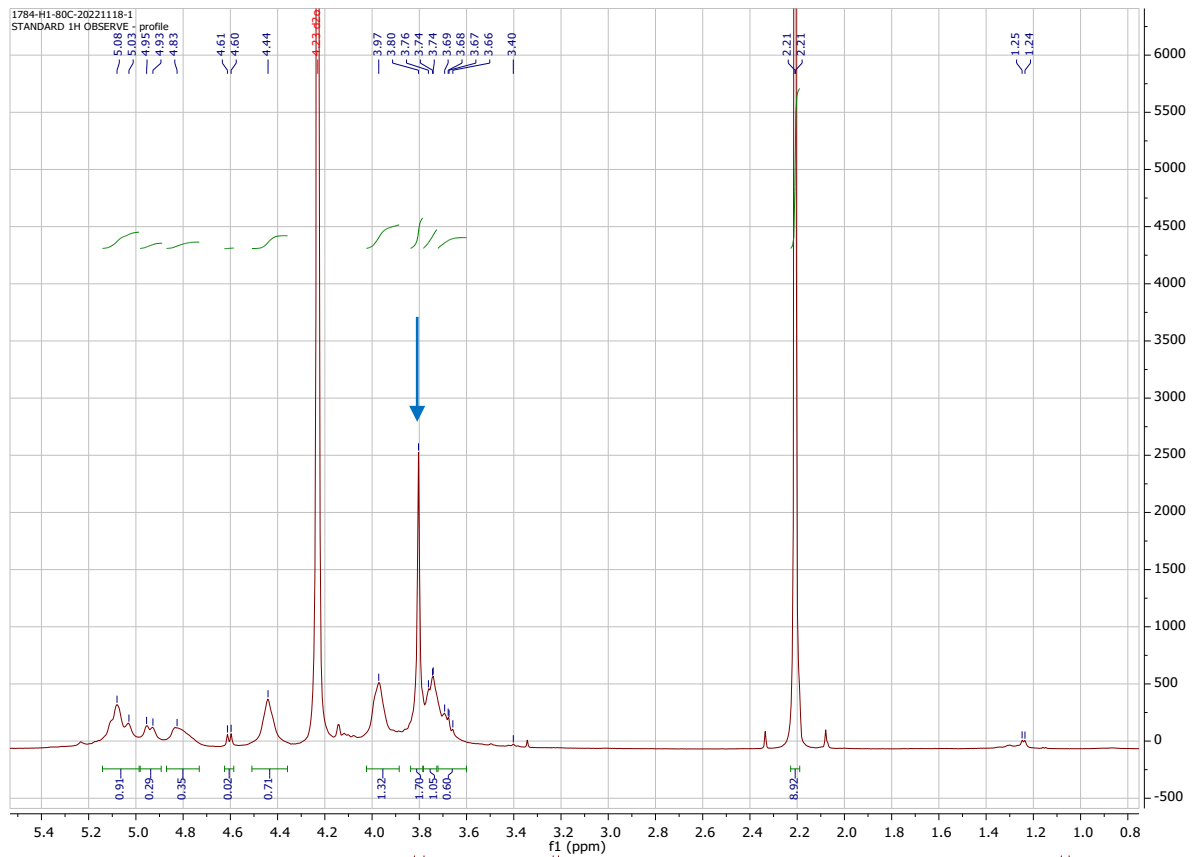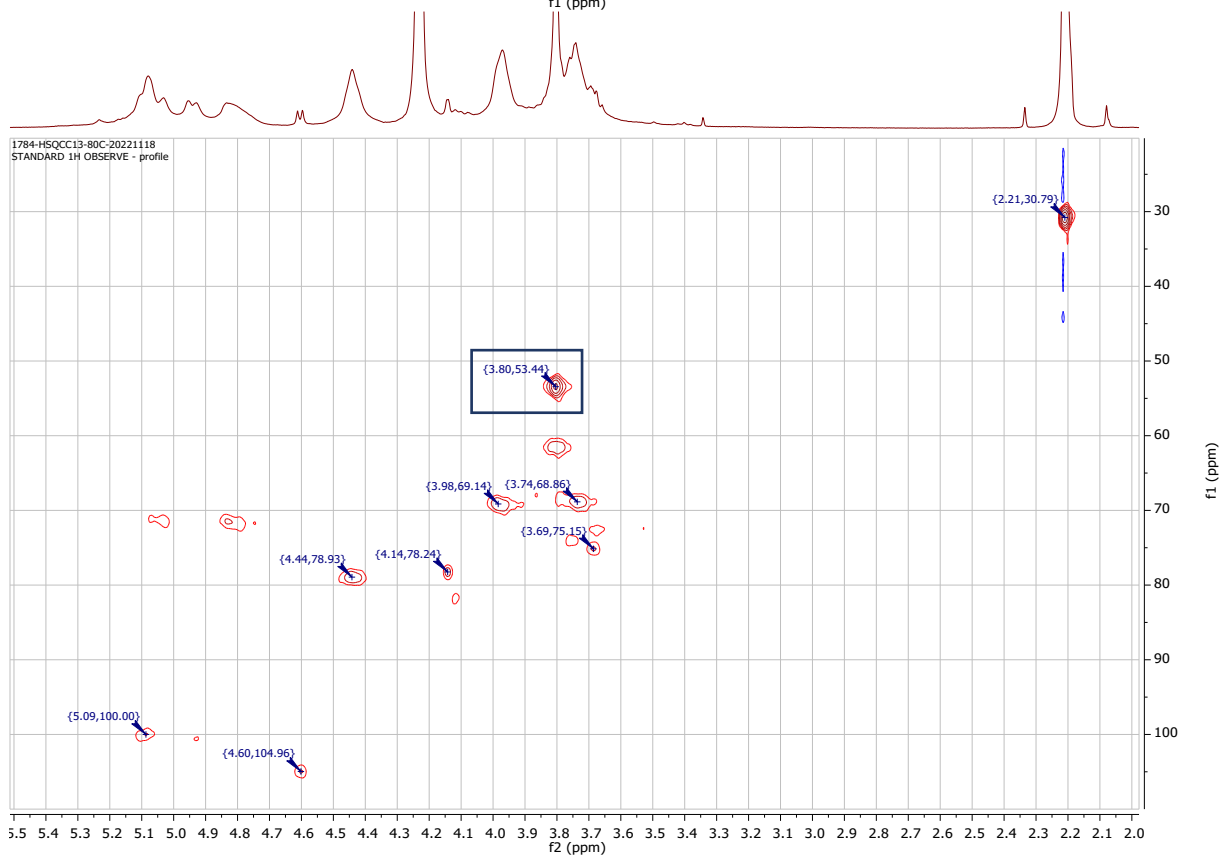

# <sup>1</sup>H and HSQC spectra of DM43HB

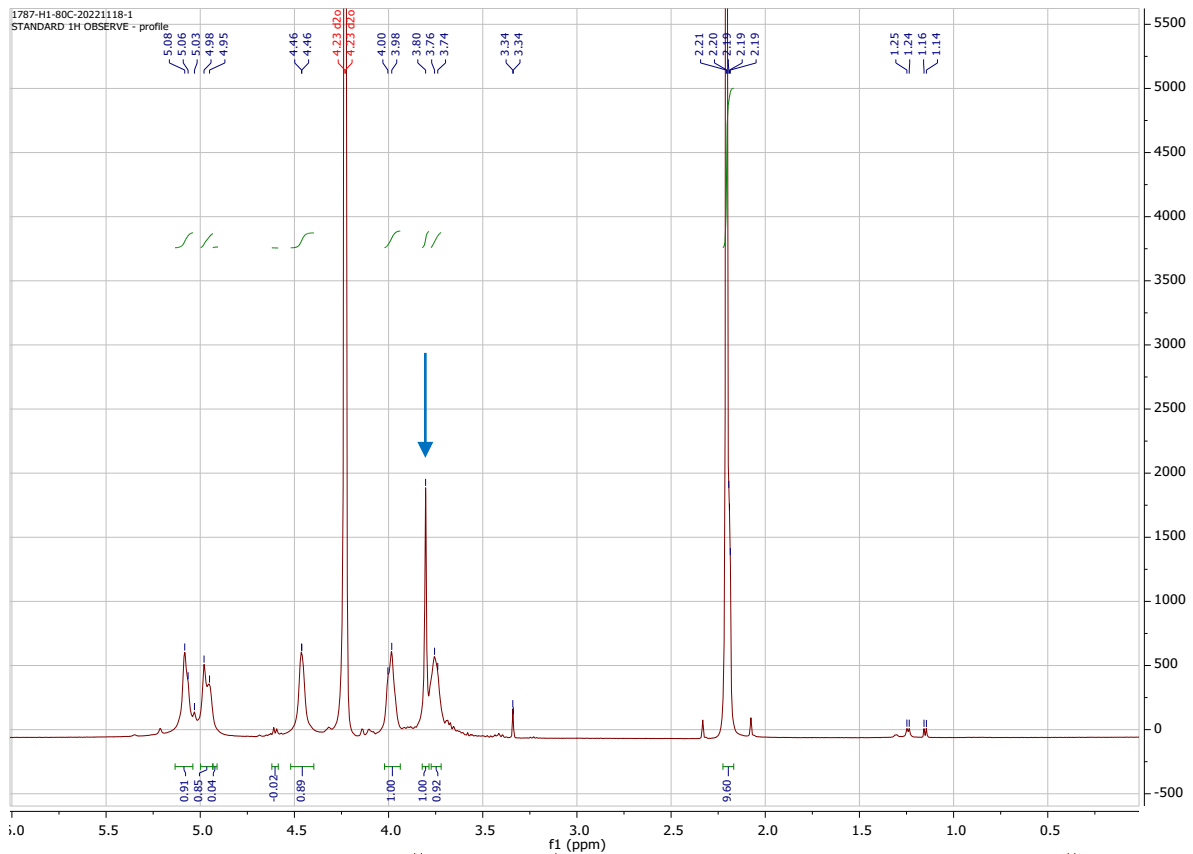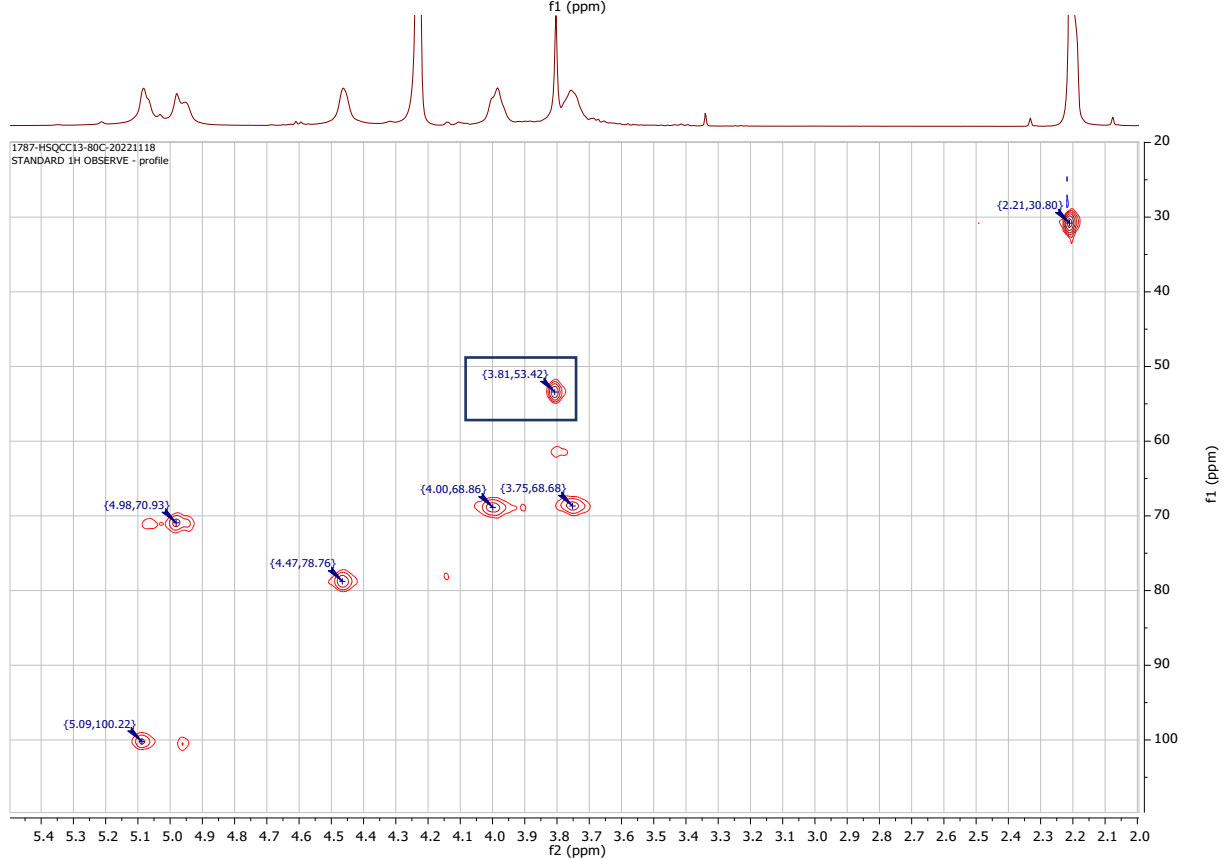

# <sup>1</sup>H and HSQC spectra of DM84LB

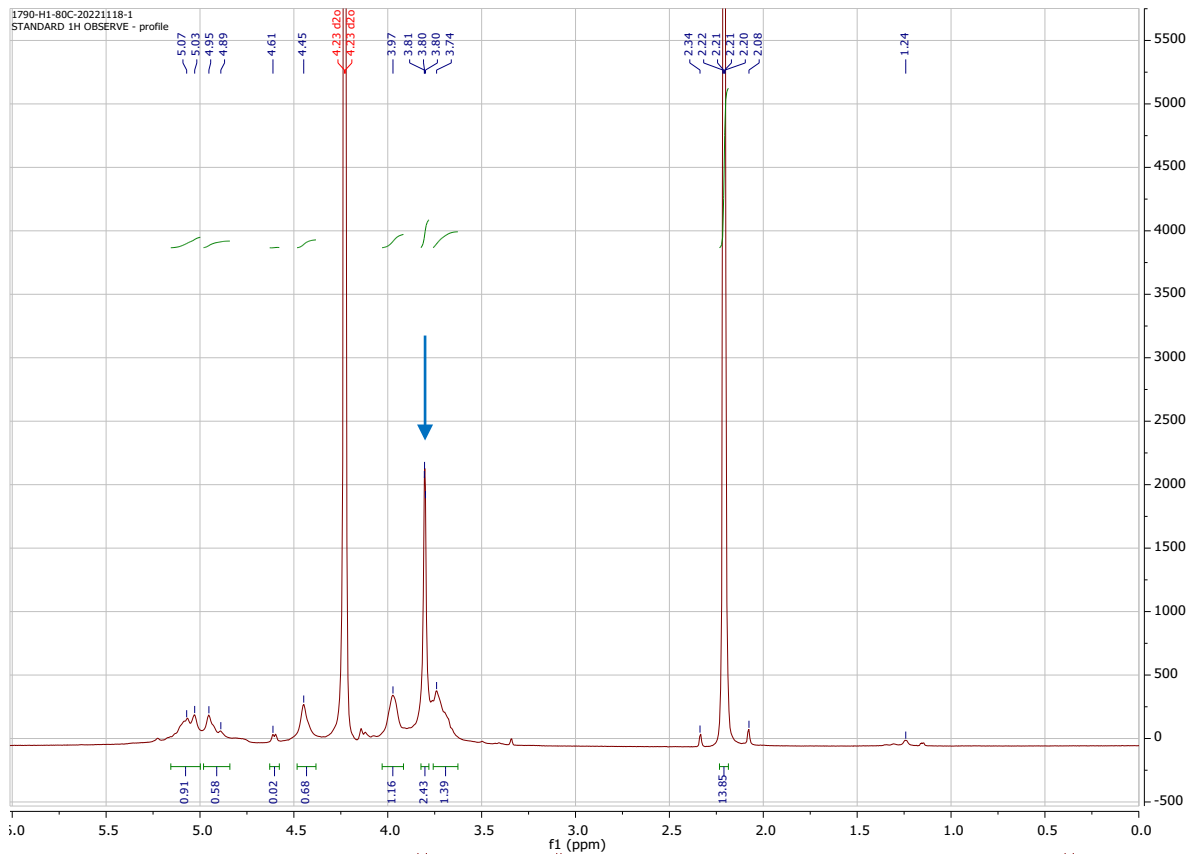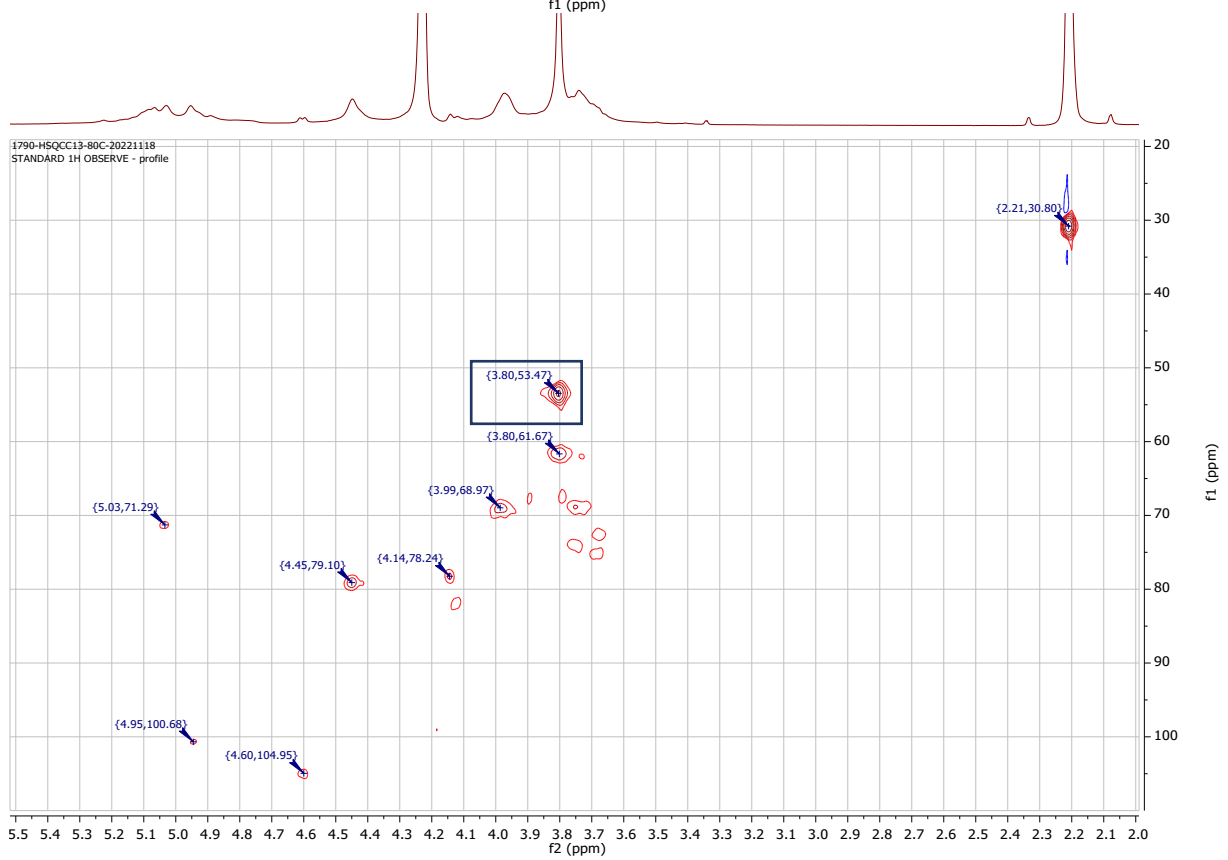



# <sup>1</sup>H and HSQC spectra of DM88HB

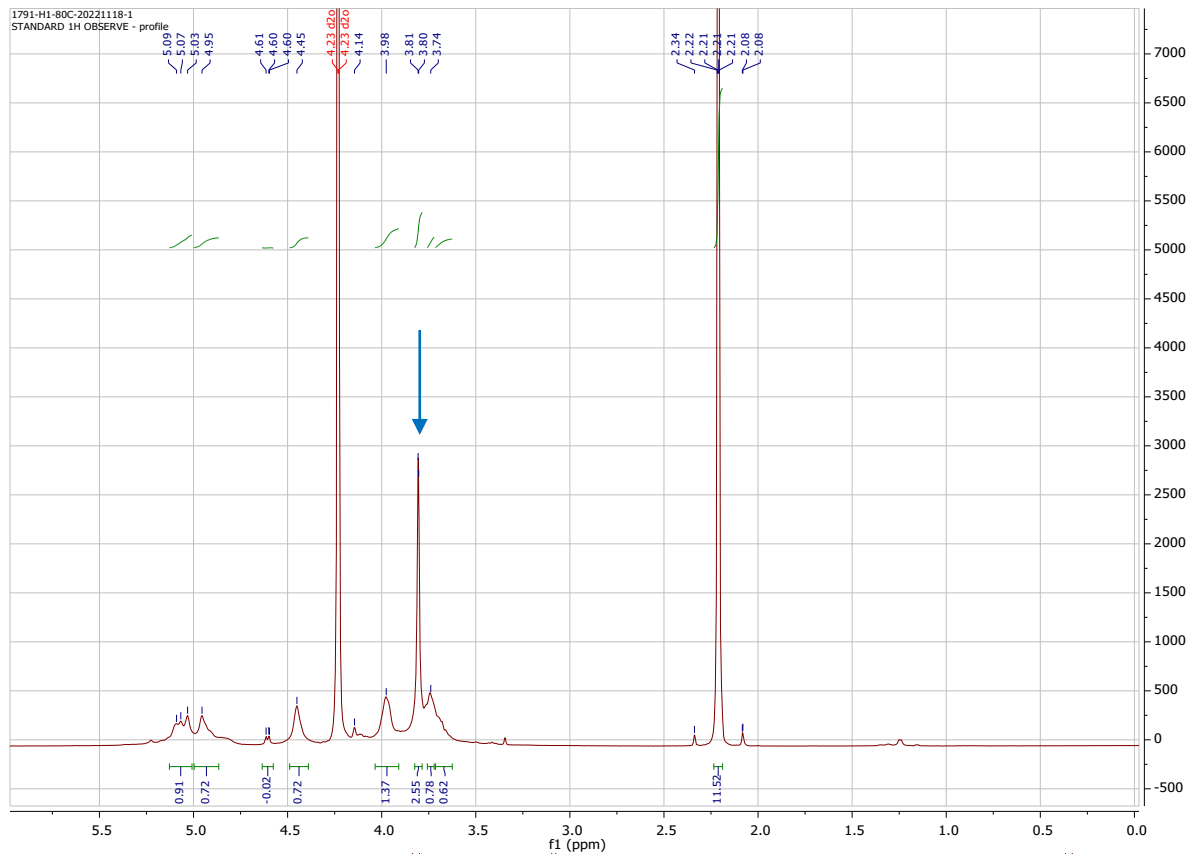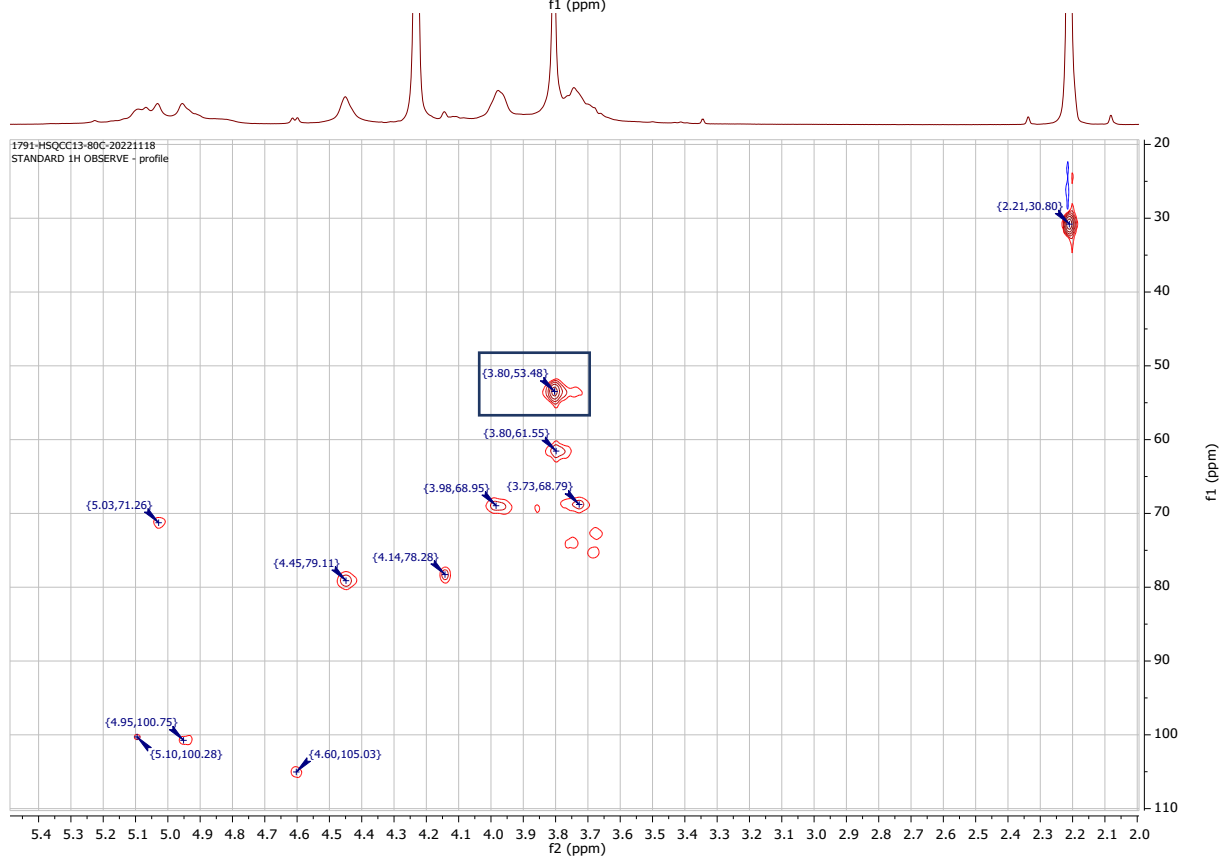

Supplement: d3fo01436c1.pdf [file d3fo01436c1.pdf]
